# Supplementary material
Source: PubMed Central journal article supplement (PMC5493210)

## Supporting Information

# Determining cysteines available for covalent inhibition across the human kinome

Zheng Zhao<sup>1</sup>, Qingsong Liu<sup>2</sup>, Spencer Bliven<sup>1,3</sup>, Lei Xie<sup>\*4,5</sup> and Philip E. Bourne<sup>\*1,6</sup>

1. National Center for Biotechnology Information, National Library of Medicine, National Institute of Health, Bethesda, MD 20892, USA
2. High Magnetic Field Laboratory, Chinese Academy of Sciences, Hefei, Anhui 230031, China
3. Laboratory of Biomolecular Research, Paul Scherrer Institute, 5232 Villigen PSI, Switzerland
4. Department of Computer Science, Hunter College, The City University of New York, NY 10065, USA
5. The Graduate Center, The City University of New York, NY 10016, USA
6. Office of the Director, National Institutes of Health, Bethesda, MD 20892, USA

## Table of contents

|                                                                                                                                                        |    |
|--------------------------------------------------------------------------------------------------------------------------------------------------------|----|
| <b>Table S2.</b> The PDB structures released with accessible cysteines. ....                                                                           | 2  |
| <b>Table S3.</b> The list of kinases with available cysteines across the human structural kinome as shown in Figure 7b. ....                           | 5  |
| <b>Table S4.</b> The list of kinases with available cysteines for the kinases without PDB released as shown in Figure 7c. ....                         | 6  |
| <b>Table S5.</b> Covalent kinase inhibitor dataset. ....                                                                                               | 7  |
| <b>Table S6.</b> The sequence alignment of the kinases with the available cysteines in five different regions across the human kinome. ....            | 10 |
| <b>Figure S1.</b> Accessible cysteines at the different locations presented on a reference binding site (pdb id 3byu). ....                            | 12 |
| <b>Figure S2.</b> The high resolution figure for the kinases with available cysteines across the human structural kinome as shown in Figure 7b. ....   | 13 |
| <b>Figure S3.</b> The high resolution figure for the kinases with available cysteines for all kinases without PDB released as shown in Figure 7c. .... | 14 |

**Table S2.** The PDB structures released with accessible cysteines.

| Sub-positions | Kinase  | Uniprot | Released PDB id                                                                                                                                                                                                                                                                                                                                                                                                                                                                                                                                                  |
|---------------|---------|---------|------------------------------------------------------------------------------------------------------------------------------------------------------------------------------------------------------------------------------------------------------------------------------------------------------------------------------------------------------------------------------------------------------------------------------------------------------------------------------------------------------------------------------------------------------------------|
| P-loop-5      | MP2K7   | O14733  | 3WZU                                                                                                                                                                                                                                                                                                                                                                                                                                                                                                                                                             |
|               | FGFR2   | P21802  | 3R11                                                                                                                                                                                                                                                                                                                                                                                                                                                                                                                                                             |
|               | FGFR4   | P22455  | 4R6V                                                                                                                                                                                                                                                                                                                                                                                                                                                                                                                                                             |
| P-loop-7      | CHK2    | O96017  | 2YCF 2YCQ 2YIT                                                                                                                                                                                                                                                                                                                                                                                                                                                                                                                                                   |
| P-loop-9      | KS6A5   | O75582  | 3KN5                                                                                                                                                                                                                                                                                                                                                                                                                                                                                                                                                             |
|               | MK08    | P45983  | 2GMX                                                                                                                                                                                                                                                                                                                                                                                                                                                                                                                                                             |
|               | KS6A3   | P51812  | 4D9T 4D9U 4JG6 4JG7 4JG8                                                                                                                                                                                                                                                                                                                                                                                                                                                                                                                                         |
|               | NEK2    | P51955  | 2JAV 2W5A 2W5B 2WQ0 2XK3 2XK4 2XK6 2XK7 2XK8 2XKC 2XKD 2XKE 2XKF 2XNM 2XNN 2XNO 2XNP 4A4A 4AFE                                                                                                                                                                                                                                                                                                                                                                                                                                                                   |
|               | PLK1    | P53350  | 2OU7 2OWB 2RKU 2YAC 3FC2 3KB7 3THB 4A4L 4A4O 4J52 4J53                                                                                                                                                                                                                                                                                                                                                                                                                                                                                                           |
|               | PLK3    | Q9H4B4  | 4B6L                                                                                                                                                                                                                                                                                                                                                                                                                                                                                                                                                             |
| Roof-3        | PLK2    | Q9NYY3  | 4I5M 4I5P 4I6B 4I6F 4I6H                                                                                                                                                                                                                                                                                                                                                                                                                                                                                                                                         |
|               | ERBB3   | P21860  | 3KEX 3LMG 4OTW 4RIW 4RIX 4RIY                                                                                                                                                                                                                                                                                                                                                                                                                                                                                                                                    |
|               | Helix-9 | CSKP    | O14936                                                                                                                                                                                                                                                                                                                                                                                                                                                                                                                                                           |
| TIE2          |         | Q02763  | 2WQB                                                                                                                                                                                                                                                                                                                                                                                                                                                                                                                                                             |
| KCC2B         |         | Q13554  | 3BHH                                                                                                                                                                                                                                                                                                                                                                                                                                                                                                                                                             |
| KCC2D         |         | Q13557  | 2VN9 2WEL                                                                                                                                                                                                                                                                                                                                                                                                                                                                                                                                                        |
| CAMK2G        |         | Q8N4I3  | 2V7O                                                                                                                                                                                                                                                                                                                                                                                                                                                                                                                                                             |
| M3K14         |         | Q99558  | 4IDV                                                                                                                                                                                                                                                                                                                                                                                                                                                                                                                                                             |
| KCC2A         |         | Q9UQM7  | 2VZ6 3SOA                                                                                                                                                                                                                                                                                                                                                                                                                                                                                                                                                        |
| Helix-11      | STK25   | O00506  | 2XIK 4NZW                                                                                                                                                                                                                                                                                                                                                                                                                                                                                                                                                        |
|               | STK10   | O94804  | 2J7T 4AOT 4BC6 4EQU                                                                                                                                                                                                                                                                                                                                                                                                                                                                                                                                              |
|               | OXSRI   | O95747  | 2VWI                                                                                                                                                                                                                                                                                                                                                                                                                                                                                                                                                             |
|               | MP2K2   | P36507  | 1S9I                                                                                                                                                                                                                                                                                                                                                                                                                                                                                                                                                             |
|               | MP2K1   | Q02750  | 3DV3 3DY7 3EQB 3EQC 3EQD 3EQF 3EQG 3EQH 3EQI 3MBL 3ORN 3OS3 3PP1 3V01 3VVH 3W8Q 3ZLS 3ZLW 3ZLY 3ZM4 4ARK 4LMN 4MNE 4U7Z 4U81 5BX0                                                                                                                                                                                                                                                                                                                                                                                                                                |
|               | MKNK2   | Q9HBH9  | 2HW7                                                                                                                                                                                                                                                                                                                                                                                                                                                                                                                                                             |
|               | IRAK4   | Q9NWX3  | 2NRU 2NRY 2OIC 2OID 4U9A                                                                                                                                                                                                                                                                                                                                                                                                                                                                                                                                         |
|               | STK24   | Q9Y6E0  | 4QMN 4QMS 4QMV 4QMW 4QO9                                                                                                                                                                                                                                                                                                                                                                                                                                                                                                                                         |
| Beta4-2       | EGFR    | P00533  | 1M17 1XKK 2EB3 2GS7 2ITN 2ITO 2ITP 2ITQ 2ITT 2ITU 2ITV 2ITW 2ITX 2ITY 2ITZ 2J5E 2J5F 2J6M 2J1U 2J1V 2RGP 3BEL 3GT8 3IKA 3LZB 3POZ 3UG2 3VJN 3VJO 3W2O 3W2P 3W2Q 3W2R 3W2S 3W32 3W33 4G5J 4G5P 4HJO 4I22 4I23 4I24 4JQ7 4JQ8 4JR3 4JRV 4LI5 4LLO 4LQM 4LRM 4R55 4RIW 4RIX 4RIY 4RJ4 4RJ5 4RJ6 4RJ7 4RJ8 4WDS 4WKQ 4ZAU 4ZSE 5C8K 5C8M 5C8N 5CAL 5CAN 5CAO 5CAP 5CAQ 5CAS 5CAU 5CAV 5CNN 5CNO 5D41 5EDQ 5EDR 5EM5 5EM6 5EM7 5EM8 5FED 5FEE 5FEQ 5HG7 5HG8 5HG9 5HIB 5HIC                                                                                           |
|               | MELK    | Q14680  | 4BKY 4BKZ 4BL1 4D2P 4D2T 4D2V 4D2W 4UMP 4UMQ 4UMR 4UMT 4UMU 5IH8 5IH9 5IHA 5IHC                                                                                                                                                                                                                                                                                                                                                                                                                                                                                  |
|               | TTBK1   | Q5TCY1  | 4BTJ 4BTK 4BTM 4NFN                                                                                                                                                                                                                                                                                                                                                                                                                                                                                                                                              |
| Beta4-4       | MP2K7   | O14733  | 3WZU                                                                                                                                                                                                                                                                                                                                                                                                                                                                                                                                                             |
|               | PK3CA   | P42336  | 3ZIM 4L23 4TV3                                                                                                                                                                                                                                                                                                                                                                                                                                                                                                                                                   |
|               | PK3CG   | P48736  | 1E8Z 2A5U 2CHX 2CHZ 3APC 3APF 3CST 3DBS 3DPD 3ENE 3IBE 3L13 3L16 3L17 3L54 3LJ3 3MJW 3ML8 3ML9 3NZS 3NZU 3P2B 3PRE 3PRZ 3PS6 3QAQ 3QAR 3QJZ 3QK0 3R7R 3T8M 3TJP 3TL5 3ZVV 3ZW3 4ANW 4ANX 4AOF 4EZJ 4EZK 4EZL 4F1S 4FAD 4FHJ 4FHK 4FJZ 4FUL 4GB9 4HLE 4HVB 4J6I 4KZC 4PS3 4PS7 4URK 4WWN 4WWP                                                                                                                                                                                                                                                                     |
|               | ALK     | Q9UM73  | 2XB7 2XBA 2XP2 2YFX 3AOX 3LCS 3LCT 4ANQ 4ANS 4CCB 4CCU 4CD0 4CLI 4CLJ 4CMO 4CMT 4CMU 4CNH 4CTB 4CTC 4DCE 4FNY 4FNZ 4FOB 4FOC 4FOD 4JOA 4MKC 4Z55 5A9U 5AA8 5AA9 5AAA 5AAB 5AAC 5FTO 5FTQ 5IMX 5IUG 5IUH 5IUI 5J7H                                                                                                                                                                                                                                                                                                                                                |
| Beta4-2       | MP2K6   | P52564  | 3FME 3VN9                                                                                                                                                                                                                                                                                                                                                                                                                                                                                                                                                        |
|               | MP2K1   | Q02750  | 1S9I 2P55 3DV3 3DY7 3E8N 3EQB 3EQC 3EQD 3EQF 3EQG 3EQH 3EQI 3MBL 3ORN 3OS3 3PP1 3SLS 3V01 3V04 3VVH 3W8Q 3WIG 3ZLS 3ZLW 3ZLX 3ZLY 3ZM4 4AN2 4AN3 4AN9 4ANB 4ARK 4LMN 4MNE 4U7Z 4U80 4U81 5BX0                                                                                                                                                                                                                                                                                                                                                                    |
|               | RN5A    | Q05823  | 4QAU 4QAV                                                                                                                                                                                                                                                                                                                                                                                                                                                                                                                                                        |
| Hinge-1       | FGFR4   | P22455  | 4QQ5 4QQC 4QRC 4R6V 4TYI 4TYJ 4UXQ 4XCU                                                                                                                                                                                                                                                                                                                                                                                                                                                                                                                          |
|               | TTK     | P33981  | 2X9E 2ZMD 3GFW 3H9F 3HMN 3HMO 3HMP 3VQU 3W1F 3WZJ 3WZK 4BHZ 4BIO 4BI1 4BI2 4C4E 4C4F 4C4G 4C4H 4C4I 4C4J 4JS8 4JT3 4O6L 4ZEG 5AP0 5AP1 5AP2 5AP3 5AP4 5AP5 5EH0 5EHY 5EI2 5EI6 5EI8                                                                                                                                                                                                                                                                                                                                                                              |
|               | MAPK2   | P49137  | 1NXX 1NY3 2JBO 2JBP 2P3G 2PZY 3A2C 3FPM 3FYJ 3FYK 3GOK 3KAO 3KC3 3KGA 3M2W 3M42 3R2B 3R2Y 3R30 3WI6                                                                                                                                                                                                                                                                                                                                                                                                                                                              |
|               | MAPK3   | Q16644  | 3FHR 3FXW 3R1N 3SHE                                                                                                                                                                                                                                                                                                                                                                                                                                                                                                                                              |
| Hinge-2       | PLK4    | O00444  | 3COK 4JXF 4YUR                                                                                                                                                                                                                                                                                                                                                                                                                                                                                                                                                   |
|               | CHK1    | O14757  | 1NVQ 1NVR 1NVS 1ZLT 1ZYS 2AYP 2BR1 2BRB 2BRG 2BRH 2BRM 2BRN 2BRO 2C3J 2C3K 2C3L 2CGU 2CGV 2CGW 2CGX 2E9N 2E9O 2E9P 2E9U 2E9V 2GDO 2GHG 2HOG 2HXL 2HXQ 2HY0 2QHM 2QHN 2ROU 2WMQ 2WMR 2WMS 2WMT 2WMU 2WMV 2WMW 2WMX 2X8D 2X8E 2X8I 2XEY 2XEZ 2XFO 2YDI 2YDJ 2YDK 2YER 2YEX 2YM3 2YM4 2YM5 2YM6 2YM7 2YM8 2YWP 3NLB 3OT3 3OT8 3PA3 3PA4 3PA5 3TKH 3TKI 3U9N 4F5M 4F5N 4FSQ 4FSR 4FST 4FSU 4FSW 4FSY 4FSZ 4FT0 4FT3 4FT5 4FT7 4FT9 4FTA 4FTC 4FTI 4FTJ 4FTK 4FTL 4FTM 4FTN 4FTO 4FTQ 4FTR 4FTT 4FTU 4GH2 4HYH 4HYI 4JIK 4QYE 4QYF 4QYG 4QYH 4RVK 4RVL 4RVM 5DLS 5F4N |
|               | IKKB    | O14920  | 4KIK                                                                                                                                                                                                                                                                                                                                                                                                                                                                                                                                                             |
|               | GAK     | O14976  | 4C57 4C58 4C59                                                                                                                                                                                                                                                                                                                                                                                                                                                                                                                                                   |
|               | ULK1    | O75385  | 4WNO 4WNP 5CI7                                                                                                                                                                                                                                                                                                                                                                                                                                                                                                                                                   |
|               | ERN1    | O75460  | 3P23 4U6R 4Y29 4YZC 4YZD 4Z7H                                                                                                                                                                                                                                                                                                                                                                                                                                                                                                                                    |
|               | STK10   | O94804  | 2J7T 4AOT 4BC6 4EQU 5AJQ                                                                                                                                                                                                                                                                                                                                                                                                                                                                                                                                         |
|               | M4K4    | O95819  | 4OBO 4OBP 4OBQ 4RVT 4U40 4U41 4U42 4U43 4U44 4U45 4ZK5 5DI1                                                                                                                                                                                                                                                                                                                                                                                                                                                                                                      |
|               | RAF1    | P04049  | 3OMV                                                                                                                                                                                                                                                                                                                                                                                                                                                                                                                                                             |
|               | CSF1R   | P07333  | 2I0V 2I0Y 2I1M 3BEA 3DPK 3KRJ 3KRL 3LCD 3LCO 4HW7 4R7H 4R7I                                                                                                                                                                                                                                                                                                                                                                                                                                                                                                      |

|             |        |           |                                                                                                                                                                                                                                                                                                                                                                                                                                                        |
|-------------|--------|-----------|--------------------------------------------------------------------------------------------------------------------------------------------------------------------------------------------------------------------------------------------------------------------------------------------------------------------------------------------------------------------------------------------------------------------------------------------------------|
|             | KIT    | P10721    | 1PKG 1T46 3G0E 3G0F 4HVS                                                                                                                                                                                                                                                                                                                                                                                                                               |
|             | BRAF   | P15056    | 1UWH 1UWJ 2FB8 3C4C 3D4Q 3IDP 3IIS 3OG7 3PPJ 3PPK 3PRF 3PRI 3PSB 3PSD 3Q4C 3Q96 3SKC 3TV4 3TV6 4DBN 4E26 4E4X 4EHE 4EHG 4FC0 4FK3 4G9C 4G9R 4H58 4JVG 4KSP 4KSQ 4MBJ 4MNF 4PP7 4R5Y 4W05 4XV1 4XV2 4XV3 4XV9 4YHT 5C9C 5CSW 5CSX 5CT7 5FD2 5HI2 5HID 5HIE                                                                                                                                                                                              |
|             | VGFR1  | P17948    | 3HNG                                                                                                                                                                                                                                                                                                                                                                                                                                                   |
|             | E2AK2  | P19525    | 2A19                                                                                                                                                                                                                                                                                                                                                                                                                                                   |
|             | WEE1   | P30291    | 1X8B 2IN6 2IO6 2Z2W 3BI6 3BIZ 3CQE 3CR0                                                                                                                                                                                                                                                                                                                                                                                                                |
|             | VGFR2  | P35968    | 1Y6A 1Y6B 1YWN 2OH4 2P2H 2P2I 2QU5 2QU6 2RL5 2XIR 3B8Q 3B8R 3BE2 3C7Q 3CJF 3CJG 3CP9 3CPB 3CPC 3DTW 3EFL 3EWH 3U6J 3VHE 3VHK 3VID 3VNT 3VO3 3WZD 3WZE 4AG8 4AGC 4AGD 4ASD 4ASE 5EW3                                                                                                                                                                                                                                                                    |
|             | CDK9   | P50750    | 3BLQ 3BLR 3LQ5 3MIA 3MY1 3TN8 3TNH 4BCF 4BCG 4BCH 4BCI 4BCJ 4IMY 4OGR                                                                                                                                                                                                                                                                                                                                                                                  |
|             | NEK2   | P51955    | 2JAV 2W5A 2W5B 2WQO 2XK3 2XK4 2XK6 2XK7 2XK8 2XKC 2XKD 2XKE 2XKF 2XNM 2XNN 2XNO 2XNP 4A4X 4AFE                                                                                                                                                                                                                                                                                                                                                         |
|             | PLK1   | P53350    | 2OU7 2OWB 2RKU 2YAC 3FC2 3KB7 3THB 4A4L 4A4O 4J52 4J53                                                                                                                                                                                                                                                                                                                                                                                                 |
|             | CDKL1  | Q00532    | 4AGU                                                                                                                                                                                                                                                                                                                                                                                                                                                   |
|             | CDK5   | Q00535    | 1UNG 1UNH 1UNL 4AU8                                                                                                                                                                                                                                                                                                                                                                                                                                    |
|             | FAK1   | Q05397    | 1MP8 2ETM 2IJM 3BZ3 4EBV 4EBW 4GU6 4GU9 4I4E 4I4F 4K8A 4K9Y 4KAB 4KAO 4Q9S                                                                                                                                                                                                                                                                                                                                                                             |
|             | RN5A   | Q05823    | 4OAU 4OAV                                                                                                                                                                                                                                                                                                                                                                                                                                              |
|             | M3K12  | Q12852    | 5CEO 5CEP                                                                                                                                                                                                                                                                                                                                                                                                                                              |
|             | STK3   | Q13188    | 4LGD                                                                                                                                                                                                                                                                                                                                                                                                                                                   |
|             | MELK   | Q14680    | 4BKY 4BKZ 4BL1 4D2P 4D2T 4D2V 4D2W 4UMP 4UMQ 4UMR 4UMT 4UMU 5IH8 5IH9 5IHA 5IHC                                                                                                                                                                                                                                                                                                                                                                        |
|             | STK11  | Q15831    | 2WTK                                                                                                                                                                                                                                                                                                                                                                                                                                                   |
|             | AAK1   | Q2M2I8    | 4WSQ 5L4Q                                                                                                                                                                                                                                                                                                                                                                                                                                              |
|             | KSR2   | Q6VAB6    | 2Y4I                                                                                                                                                                                                                                                                                                                                                                                                                                                   |
|             | PTK1   | Q8IYN9    | 3PXK                                                                                                                                                                                                                                                                                                                                                                                                                                                   |
|             | NEK1   | Q96PY6    | 4B9D                                                                                                                                                                                                                                                                                                                                                                                                                                                   |
|             | SLK    | Q9H2G2    | 2J51 2JFL 2UV2 4USF                                                                                                                                                                                                                                                                                                                                                                                                                                    |
|             | PLK3   | Q9H4B4    | 4B6L                                                                                                                                                                                                                                                                                                                                                                                                                                                   |
|             | BMP2K  | Q9NSY1    | 4W9W 4W9X 5I3O 5I3R 5IKW                                                                                                                                                                                                                                                                                                                                                                                                                               |
|             | PLK2   | Q9NYY3    | 4I5M 4I5P 4I6B 4I6F 4I6H                                                                                                                                                                                                                                                                                                                                                                                                                               |
|             | E2AK3  | Q9NZJ5    | 4G31 4G34 4M7I 4X7H 4X7J 4X7K 4X7L 4X7N 4X7O                                                                                                                                                                                                                                                                                                                                                                                                           |
|             | TBK1   | Q9UHD2    | 4EUT 4EUU 4IM0 4IM2 4IM3 4IW0 4IW1 4IWP 4IWX                                                                                                                                                                                                                                                                                                                                                                                                           |
|             | TNIK   | Q9UKE5    | 2X7F                                                                                                                                                                                                                                                                                                                                                                                                                                                   |
| Hinge-3     | CSF1R  | P07333    | 2IOV 2IOY 2I1M 3BEA 3DPK 3KRJ 3KRL 3LCD 3LCO                                                                                                                                                                                                                                                                                                                                                                                                           |
|             | KIT    | P10721    | 1PKG 1T46 3G0E 3G0F 4HVS                                                                                                                                                                                                                                                                                                                                                                                                                               |
|             | RON    | Q04912    | 3PLS                                                                                                                                                                                                                                                                                                                                                                                                                                                   |
| Front-2     | MP2K7  | O14733    | 3WZU                                                                                                                                                                                                                                                                                                                                                                                                                                                   |
|             | EGFR   | P00533    | 1M17 1XKK 2EB3 2GS7 2ITN 2ITO 2ITP 2ITQ 2ITT 2ITU 2ITV 2ITW 2ITX 2ITY 2ITZ 2J5F 2J6M 2JIU 2RGP 3BEL 3GT8 3KA 3LZB 3POZ 3UG2 3VJN 3VJO 3W2O 3W2P 3W2Q 3W2R 3W2S 3W32 3W33 4G5I 4G5P 4HJO 4I22 4I23 4I24 4JQ7 4JQ8 4JR3 4JRV 4LI5 4LLO 4LQM 4LRM 4R5S 4RIW 4RIX 4RIY 4RJ4 4RJ5 4RJ6 4RJ7 4RJ8 4WDS 4ZAU 4ZSE 5C8K 5C8M 5C8N 5CAL 5CAN 5CAO 5CAP 5CAQ 5CAS 5CAU 5CAV 5CNN 5CNO 5D41 5EDQ 5EDR 5EM5 5EM6 5EM7 5EM8 5FED 5FEE 5FEQ 5HG7 5HG8 5HG9 5HIB 5HIC |
|             | ERBB2  | P04626    | 3PPO 3RCD                                                                                                                                                                                                                                                                                                                                                                                                                                              |
|             | BMX    | P51813    | 3SXR 3SXS                                                                                                                                                                                                                                                                                                                                                                                                                                              |
|             | JAK3   | P52333    | 1YVJ 3LXK 3LXL 3PJC 3ZC6 3ZEP 4HVD 4HVG 4HVH 4HVI 4I6Q 4QPS 4QT1 4RIO 4VOG 4Z16                                                                                                                                                                                                                                                                                                                                                                        |
|             | BTK    | Q06187    | 3GEN 3K54 3OCS 3OCT 3PIX 3PIY 3PIZ 3PJ2 3PJ3 4OT5 4OT6 4OTQ 4OTR 4RFY 4RFZ 4RGO 4RX5 4YHF 4Z3V 4ZLY 4ZLZ 5BPY 5BQ0 5FBN 5FBO                                                                                                                                                                                                                                                                                                                           |
|             | ITK    | Q08881    | 1SM2 1SNU 3MIY 3MJ1 3MJ2 3QGW 3QGY 3T9T 3V5J 3V5L 3V8T 3V8W 4HCT 4HCU 4HCV 4KIO 4L7S 4M0Y 4M0Z 4M12 4M13 4M14 4M15 4MF0 4MF1 4PP9 4PPA 4PPB 4PPC 4PPN 4QD6                                                                                                                                                                                                                                                                                             |
| ERBB4       | Q15303 | 2R4B 3BBT |                                                                                                                                                                                                                                                                                                                                                                                                                                                        |
| Front-3     | MAPK8  | A114K2    | 2XRW 4G1W 4HYS 4HYU 4IZY                                                                                                                                                                                                                                                                                                                                                                                                                               |
|             | MK08   | P45983    | 2GMX 2NO3 3ELJ 3V3V 4AWI 4E73 4L7F 4QTD                                                                                                                                                                                                                                                                                                                                                                                                                |
|             | MK10   | P53779    | 1JNK 1PMQ 1PMV 2O0U 2O2U 2P33 2ZDU 3CGF 3CGO 3DA6 3G90 3G9L 3G9N 3OXI 3OY1 3RTP 3TTI 3TTJ 3V6R 3V6S 4KKE 4KKH 4U79 4W4V 4W4W 4W4X 4W4Y 4WHZ                                                                                                                                                                                                                                                                                                            |
| Catalytic-2 | CSF1R  | P07333    | 3LCO 4HW7 4R7H 4R7I                                                                                                                                                                                                                                                                                                                                                                                                                                    |
|             | KIT    | P10721    | 1T46 3G0F 4HVS                                                                                                                                                                                                                                                                                                                                                                                                                                         |
|             | FGFR1  | P11362    | 1AGW 1FGI 2FGI 3C4F 3GQI 3GQL 3JS2 3RHX 3TTO 3WJ6 4F64 4F65 4NK9 4NKA 4NKS 4UWB 4UWC 4WUN 4ZSA 5A46 5A4C 5AM7 5B7V 5EW8                                                                                                                                                                                                                                                                                                                                |
|             | VGFR1  | P17948    | 3HNG                                                                                                                                                                                                                                                                                                                                                                                                                                                   |
|             | FGFR2  | P21802    | 2PZR 3B2T 3RI1 4J95 4J97 4J99                                                                                                                                                                                                                                                                                                                                                                                                                          |
|             | FGFR4  | P22455    | 4QQ5 4QQC 4QRC 4R6V 4TYI 4TYJ 4UXQ                                                                                                                                                                                                                                                                                                                                                                                                                     |
|             | FGFR3  | P22607    | 4K33                                                                                                                                                                                                                                                                                                                                                                                                                                                   |
|             | VGFR2  | P35968    | 1Y6A 1YWN 2OH4 2P2H 2P2I 2QU6 2RL5 2XIR 3B8Q 3B8R 3BE2 3CP9 3CPB 3CPC 3DTW 3EFL 3EWH 3U6J 3VHE 3VHK 3VID 3VNT 3VO3 3WZD 3WZE 4AG8 4ASD 4ASE 5EW3                                                                                                                                                                                                                                                                                                       |
|             | JAK3   | P52333    | 4HVD 4HVH 4HVI 4I6Q 4QPS 4QT1 4Z16                                                                                                                                                                                                                                                                                                                                                                                                                     |
|             | FAK2   | Q14289    | 3ET7 3FZP 3FZR 3FZS 3FZT 3H3C 4H1J 4H1M                                                                                                                                                                                                                                                                                                                                                                                                                |
| Catalytic-9 | ABL1   | P00519    | 2F4J 2G2I 2H24 2V7A 3UE4 4WA9                                                                                                                                                                                                                                                                                                                                                                                                                          |
|             | NTRK1  | P04629    | 4AOJ 4PMM 4PMS 4PMT                                                                                                                                                                                                                                                                                                                                                                                                                                    |
|             | INSR   | P06213    | 1IR3 2Z8C 3BU5 4IBM                                                                                                                                                                                                                                                                                                                                                                                                                                    |
|             | FES    | P07332    | 3BKB 3CD3                                                                                                                                                                                                                                                                                                                                                                                                                                              |
|             | IGF1R  | P08069    | 1K3A 2ZM3 3F5P 3I81 3LVP 3NW6 3NW7 3O23                                                                                                                                                                                                                                                                                                                                                                                                                |
|             | MET    | P08581    | 1R0P 2RFS 2WD1 2WGI 3A4P 3C1X 3CCN 3CD8 3DKC 3DKF 3I5N 3Q6W 3QTI 3R7O 3RHK 3VW8 3ZBX 3ZCS 3ZCL 3ZXZ 3ZZE 4AOI 4AP7 4DEG 4DEH 4DEI 4EEV 4GG5 4GG7 4IWD 4KNB 4MXC 4XMO 4XYF                                                                                                                                                                                                                                                                              |
|             | ROS1   | P08922    | 4UXL                                                                                                                                                                                                                                                                                                                                                                                                                                                   |

|       |         |                          |                                                                                                                                                                                                                                                                               |
|-------|---------|--------------------------|-------------------------------------------------------------------------------------------------------------------------------------------------------------------------------------------------------------------------------------------------------------------------------|
|       | ABL2    | P42684                   | 2XYN 3GVU 3HMI                                                                                                                                                                                                                                                                |
|       | BMX     | P51813                   | 3SXS                                                                                                                                                                                                                                                                          |
|       | LIMK1   | P53667                   | 3S95                                                                                                                                                                                                                                                                          |
|       | LIMK2   | P53671                   | 4TPT                                                                                                                                                                                                                                                                          |
|       | BTK     | Q06187                   | 4NWM 4OT5 4OT6 4OTF 4OTQ 4OTR 4RFY 4RFZ 4RGO                                                                                                                                                                                                                                  |
|       | DDR1    | Q08345                   | 4CKR                                                                                                                                                                                                                                                                          |
|       | ITK     | Q08881                   | 15M2 15NU 3MIY 3MJ1 3MJ2 3T9T 3V5L 4L7S 4M0Y 4M0Z 4M12 4M13 4M14 4M15 4MF1 4PP9 4PPA 4PPC 4PQN                                                                                                                                                                                |
|       | MERTK   | Q12866                   | 3TCP 4M3Q 4MH7 4MHA                                                                                                                                                                                                                                                           |
|       | NTRK2   | Q16620                   | 4AT3 4AT4 4AT5                                                                                                                                                                                                                                                                |
|       | ALK     | Q9UM73                   | 2XB7 2XBA 2XP2 2YFX 3LCS 3LCT 4ANQ 4ANS 4CCB 4CCU 4CD0 4CLI 4CLJ 4CMO 4CMT 4CMU 4CNH 4CTB 4CTC 4FOB 4FOC 4FOD 4JOA 4MKC                                                                                                                                                       |
| DFG-3 | MP2K7   | O14733                   | 3WZU                                                                                                                                                                                                                                                                          |
|       | GAK     | O14976                   | 4C57 4C58 4C59                                                                                                                                                                                                                                                                |
|       | M3K7    | O43318                   | 2EVA 2YIY 4GS6 4L3P 4L52 4L53 4O91 5JGA 5JGB 5JGD                                                                                                                                                                                                                             |
|       | CDKL5   | O76039                   | 4BGQ                                                                                                                                                                                                                                                                          |
|       | KIT     | P10721                   | 1PKG 1T46 3G0E 3G0F 4HVS                                                                                                                                                                                                                                                      |
|       | VGFR1   | P17948                   | 3HNG                                                                                                                                                                                                                                                                          |
|       | MK03    | P27361                   | 2Z0Q 4QTB                                                                                                                                                                                                                                                                     |
|       | MK01    | P28482                   | 1PME 1TVO 1WZY 2OJG 2OJI 2OJJ 2Y9Q 3I5Z 3I60 3TEI 3W55 4FMQ 4FUX 4FV1 4FV2 4FV3 4FV4 4FV5 4FV6 4FV7 4FV8 4FV9 4G6N 4G6O 4H3P 4H3Q 4I25 4NIF 4O6E 4QP1 4QP2 4QP3 4QP4 4QP6 4QP7 4QP8 4QP9 4QPA 4QTA 4QTE 4XJ0 4ZZM 4ZZN 4ZZO 5AX3 5BUE 5BUI 5BUJ 5BVD 5BVE 5BVF 5K4I 5LCJ 5LCK |
|       | VGFR2   | P35968                   | 1Y6A 1Y6B 1YWN 2OH4 2P2H 2P2I 2QU5 2QU6 2RL5 2XIR 3B8Q 3B8R 3BE2 3C7Q 3CJG 3CP9 3CPB 3CPC 3DTW 3EFL 3EWH 3U6J 3VHE 3VHK 3VID 3VNT 3VO3 3WZD 3WZE 4AG8 4AGC 4AGD 4ASD 4ASE 5EW3                                                                                                |
|       | MP2K2   | P36507                   | 1S9I                                                                                                                                                                                                                                                                          |
|       | TGFR1   | P36897                   | 5E8X 5E90                                                                                                                                                                                                                                                                     |
|       | TGFR2   | P37173                   | 5E8Y 5E91 5E92                                                                                                                                                                                                                                                                |
|       | MP2K4   | P45985                   | 3ALN 3ALO                                                                                                                                                                                                                                                                     |
|       | GSK3B   | P49841                   | 1H8F 1J1B 1J1C 1O9U 1PYX 1Q3D 1Q3W 1Q41 1Q4L 1Q5K 1R0E 1UV5 2JLD 2O5K 2OW3 3DU8 3F7Z 3F88 3GB2 3I4B 3L1S 3M1S 3PUP 3Q3B 3SAY 3SD0 3ZDI 3ZRK 3ZRL 3ZRM 4ACC 4ACD 4ACG 4ACH 4AFJ 4B7T 4DIT 4IQ6 4J1R 4J71 4NMO 4NM3 4NM5 4NM7 5F94 5F95 5HLN 5HLP                               |
|       | KS6A3   | P51812                   | 4D9T 4D9U 4JG6 4JG7 4JG8                                                                                                                                                                                                                                                      |
|       | MP2K6   | P52564                   | 3FME 3VN9                                                                                                                                                                                                                                                                     |
|       | CDKL1   | Q00532                   | 4AGU                                                                                                                                                                                                                                                                          |
|       | MP2K1   | Q02750                   | 1S9J 2P55 3DV3 3DY7 3E8N 3EQB 3EQC 3EQD 3EQF 3EQG 3EQH 3EQI 3MBL 3ORN 3OS3 3PP1 3SL5 3V01 3V04 3VVH 3W8Q 3WIG 3ZLS 3ZLW 3ZLX 3ZLY 3ZM4 4AN2 4AN3 4AN9 4ANB 4ARK 4LMN 4MNE 4U7Z 4U80 4U81 5BX0                                                                                 |
|       | PRP4B   | Q13523                   | 4IFC 4IIR 4IJP                                                                                                                                                                                                                                                                |
|       | FLT3    | P36888                   | 1RJB 4RT7 4XUF                                                                                                                                                                                                                                                                |
|       | AAK1    | Q2M2I8                   | 4WSQ 5L4Q                                                                                                                                                                                                                                                                     |
|       | CDKL3   | Q8IVW4                   | 3ZDU                                                                                                                                                                                                                                                                          |
|       | CDKL2   | Q92772                   | 4AAA 4BBM                                                                                                                                                                                                                                                                     |
|       | M3K14   | Q99558                   | 4DN5 4IDT 4IDV                                                                                                                                                                                                                                                                |
|       | MNK1    | Q9BUB5                   | 2HW6                                                                                                                                                                                                                                                                          |
|       | MKNK2   | Q9HBH9                   | 2HW7                                                                                                                                                                                                                                                                          |
| BMP2K | Q9NSY1  | 4W9W 4W9X 5I3O 5I3R 5IKW |                                                                                                                                                                                                                                                                               |
| MLTK  | Q9NYL2  | 5HES                     |                                                                                                                                                                                                                                                                               |
| DFG-4 | KS6B1   | P23443                   | 3WF7 3WF8 3WF9                                                                                                                                                                                                                                                                |
|       | RPS6KB1 | Q72721                   | 4L3J 4L3L 4L46                                                                                                                                                                                                                                                                |

Note: Red color shows the structure with the covalent interaction between the cysteine and ligand.

**Table S3.** The list of kinases with available cysteines across the human structural kinome as shown in Figure 7b.

| <b>Regions</b> | <b>Kinases</b>                                                                                                                                                           |
|----------------|--------------------------------------------------------------------------------------------------------------------------------------------------------------------------|
| P-loop         | ACVR2A CHK2 FGFR2 FGFR4 CSNK1G1 CSNK1G3 RPS6KA3 RPS6KA5 MET MAP2K7 NEK2<br>PLK1 PLK2 PLK3 SRC VRK1 ZAP70                                                                 |
| Roof of pocket | MAP2K7                                                                                                                                                                   |
| Front pocket   | BMX BTK CASK EGFR ERBB2 ERBB4 ITK JAK3 MAPK8 MAPK10 MAP2K7 RNASEL STK11                                                                                                  |
| DFG-3          | AAK1 BMP2K CDKL1 CDKL2 CDKL3 CDKL5 FLT3 GAK GSK3B KIT RPS6KA3 MAP3K14<br>MAP3K7 MAPK1 MAPK3 MNK1 MKNK2 MLTK MAP2K1 MAP2K2 MAP2K4 MAP2K6 MAP2K7<br>PRPF4B TGFBR2 FLT1 KDR |
| Catalytic-2    | CSF1R FAK2 FGFR1 FGFR2 FGFR3 FGFR4 JAK3 KIT FLT1 KDR                                                                                                                     |

**Table S4.** The list of kinases with available cysteines for the kinases without PDB released as shown in Figure 7c.

| <b>Regions</b> | <b>Kinases</b>                                                                                                                        |
|----------------|---------------------------------------------------------------------------------------------------------------------------------------|
| P-loop         | CSNK1G2 CRIK Erk3 FGFR1 FGFR3 FGR IRAK1 LIMK1 MAP3K1 MSK2 NEK10 PAN3<br>ROR1 RSK1 RSK3 RSK4 SgK069 SgK223 SuRTK106 TNK1 VACAMKL YES   |
| Roof of pocket |                                                                                                                                       |
| Front pocket   | BLK EphB3 TEC TXK MAST3 MAST2 MAST1 MAST4 Trio TSSK3 ATM SMG1 ADCK4<br>ADCK5 RIOK2 SgK493 BMPR2 MISR2 PINK1 Obscn JNK2 PFTAIRES1 SPEG |
| DFG-3          | CDKL4 Erk7 FLT4 Fused GSK3A MAP2K3 MAP2K5 MAPKAPK5 TNIK NLK Obscn<br>PDGFRa PDGFRb PKD1 PKD2 PKD3 RSK3 RSK4 SPEG SuRTK106             |
| Catalytic-2    | FLT4 PDGFRa PDGFRb FLT3 FER FES ANPa STK6 CDKL1 CDKL4                                                                                 |

**Table S5.** Covalent kinase inhibitor dataset.

| Ligand name     | Cysteine site   | UniprotKB ID of Kinase as targets                                                                          | PMID                                                   |
|-----------------|-----------------|------------------------------------------------------------------------------------------------------------|--------------------------------------------------------|
| CDDO-Me         | Activation-loop | O14920                                                                                                     | 16998237                                               |
| Nimbolide       | Activation-loop | O15111 O14920                                                                                              | 20829362                                               |
| Compound3       | Catalytic-2     | P10721                                                                                                     | 21322567                                               |
| Cl-Radicicol; A | DFG-3           | P35916 P35968 P36888 P09619                                                                                | 10695671                                               |
| Radicicol; A    | DFG-3           | P35916 P35968 P36888 P09619                                                                                | 10695671                                               |
| L-783290        | DFG-3           | Q02750                                                                                                     | 10695671                                               |
| Chloromethyl    | DFG-3           | P49841                                                                                                     | 14561081; 19747834                                     |
| KB-283641       | DFG-3           | P49841                                                                                                     | 14561081; 19747834                                     |
| Chloromethyl    | DFG-3           | P49841                                                                                                     | 14561081; 19747834                                     |
| E6201           | DFG-3           | Q02750 P36507                                                                                              | 24448821                                               |
| FR265082        | DFG-3           | P28482 Q02750 P35968<br>P16234 P35916 P36888 P17948                                                        | 17194451; 10695671;<br>19821461                        |
| 5Z-7-Oxozeaenol | DFG-3           | O14733 Q02750 P28482<br>O43318 P35916 P35968<br>P36888 P09619                                              | 25529738; 17194451;<br>17676571; 23272696              |
| Hypothemycin    | DFG-3           | P28482 Q388M1 Q02750<br>P35968 P16234 P35916 P36888<br>P17948 P10721 P51955 P27361<br>Q15139 Q8IW41 P49841 | 18571434; 23853713;<br>17194451; 19821461;<br>16537514 |
| 10753475-10     | Front pocket    | P00533                                                                                                     | 10753475                                               |
| 10753475-13     | Front pocket    | P00533                                                                                                     | 10753475                                               |
| 10753475-21     | Front pocket    | P00533                                                                                                     | 10753475                                               |
| 10753475-22     | Front pocket    | P00533                                                                                                     | 10753475                                               |
| 10753475-24     | Front pocket    | P00533                                                                                                     | 10753475                                               |
| 10753475-26     | Front pocket    | P00533                                                                                                     | 10753475                                               |
| 10753475-27     | Front pocket    | P00533                                                                                                     | 10753475                                               |
| 10753475-7      | Front pocket    | P00533                                                                                                     | 10753475                                               |
| CHEMBL31588     | Front pocket    | P00533                                                                                                     | 10753475                                               |
| CHEMBL283201    | Front pocket    | P00533                                                                                                     | 10753475                                               |
| CHEMBL27685     | Front pocket    | P00533                                                                                                     | 10753475                                               |
| CHEMBL280757    | Front pocket    | P00533                                                                                                     | 10753475                                               |
| CHEMBL31369     | Front pocket    | P00533                                                                                                     | 10753475                                               |
| CHEMBL27688     | Front pocket    | P00533                                                                                                     | 10753475                                               |
| CHEMBL31326     | Front pocket    | P00533                                                                                                     | 10753475                                               |
| CHEMBL32079     | Front pocket    | P00533                                                                                                     | 10753475                                               |
| AGN-PC-09QDFK   | Front pocket    | P00533                                                                                                     | 10753475                                               |
| CHEMBL31419     | Front pocket    | P00533                                                                                                     | 10753475                                               |
| CHEMBL31373     | Front pocket    | P00533                                                                                                     | 10753475                                               |
| CHEMBL31815     | Front pocket    | P00533                                                                                                     | 10753475                                               |
| neratinib       | Front pocket    | P00533 P04626                                                                                              | 22037378; 15173008                                     |
| ibrutinib       | Front pocket    | Q06187                                                                                                     | 17154430                                               |
| Tube716         | Front pocket    | Q06187                                                                                                     | 17154430                                               |
| US8476284-5     | Front pocket    | Q06187                                                                                                     | 17154430                                               |
| US8476284-41    | Front pocket    | Q06187                                                                                                     | 17154430                                               |
| US8476284-42    | Front pocket    | Q06187                                                                                                     | 17154430                                               |
| US8497277-9     | Front pocket    | Q06187                                                                                                     | 17154430                                               |
| US8476284-9     | Front pocket    | Q06187                                                                                                     | 17154430                                               |
| US8476284-39    | Front pocket    | Q06187                                                                                                     | 17154430                                               |
| US8476284-38    | Front pocket    | Q06187                                                                                                     | 17154430                                               |
| US8497277-15    | Front pocket    | Q06187                                                                                                     | 17154430                                               |
| SCHEMBL1613911  | Front pocket    | Q06187                                                                                                     | 17154430                                               |
| FR264744        | Front pocket    | P28482                                                                                                     | 17194451                                               |
| pelitinib       | Front pocket    | P00533                                                                                                     | 17416531;                                              |
| PF00299804      | Front pocket    | P00533 P04626 Q15303                                                                                       | 18089823                                               |
| Canertinib      | Front pocket    | P00533 P04626 Q15303                                                                                       | 18089823; 18667312;                                    |

|                 |              |                                                        |                                 |
|-----------------|--------------|--------------------------------------------------------|---------------------------------|
|                 |              | P52333 P51451 P51813<br>Q06187 Q08881                  | 10753475                        |
| PD168393        | Front_pocket | P00533 P04626 Q15303<br>P52333 P51451 P51813<br>Q06187 | 18667312                        |
| WZ4002          | Front_pocket | Q06187 P51451 P00533<br>Q15303 Q08881                  | 20033049                        |
| afatinib        | Front_pocket | P00533 P04626                                          | 20550212; 22037378;<br>18408761 |
| PCI33380        | Front_pocket | Q06187                                                 | 20615965                        |
| Btk-inhibitor-4 | Front_pocket | P51813 Q06187 P51451<br>P00533 P04626 P52333 P42680    | 20615965; 17154430              |
| poziotinib      | Front_pocket | P00533 P04626 Q15303                                   | 21306821                        |
| JNK-IN-1        | Front_pocket | P45983 P45984 P53779                                   | 22284361                        |
| JNK-IN-2        | Front_pocket | P45983 P45984 P53779                                   | 22284361                        |
| JNK-IN-4        | Front_pocket | P45983 P45984 P53779                                   | 22284361                        |
| JNK-IN-5        | Front_pocket | P45983 P45984 P53779                                   | 22284361                        |
| JNK-IN-7        | Front_pocket | P45983 P45984 P53779                                   | 22284361                        |
| JNK-IN-8        | Front_pocket | P45983 P45984 P53779                                   | 22284361                        |
| JNK-IN-9        | Front_pocket | P53779                                                 | 22284361                        |
| JNK-IN-10       | Front_pocket | P53779                                                 | 22284361                        |
| JNK-IN-11       | Front_pocket | P45983 P45984 P53779                                   | 22284361                        |
| JNK-IN-12       | Front_pocket | P45983 P45984 P53779                                   | 22284361                        |
| spebrutinib     | Front_pocket | Q06187                                                 | 22612424                        |
| CNX-774         | Front_pocket | Q06187                                                 | 22621397                        |
| G5K             | Front_pocket | Q08881                                                 | 23098091                        |
| CHEMBL2179816   | Front_pocket | Q08881                                                 | 23098091                        |
| CHEMBL2179804   | Front_pocket | Q08881                                                 | 23098091                        |
| IAQ             | Front_pocket | Q08881                                                 | 23098091                        |
| 18R             | Front_pocket | Q08881                                                 | 23098091                        |
| CNX-1351        | Front_pocket | P42336                                                 | 23360348                        |
| CNX-1220        | Front_pocket | P42336                                                 | 23360348                        |
| BMX-IN-1        | Front_pocket | P51813                                                 | 23594111                        |
| rociletinib     | Front_pocket | P00533                                                 | 24065731                        |
| QL47            | Front_pocket | Q06187                                                 | 24556163                        |
| Compound31      | Front_pocket | P51813 Q06187 P51451<br>P42680                         | 24915291                        |
| Compound38      | Front_pocket | P51813 Q06187 P51451<br>P00533 P04626 Q15303<br>P42680 | 24915291                        |
| 37Q             | Front_pocket | P52333                                                 | 25552479                        |
| PRN694          | Front_pocket | P51813 Q06187 P51451<br>Q08881 P52333 P42680           | 25593320                        |
| naquotinib      | Front_pocket | P00533                                                 | 26508839                        |
| ONO-4059        | Front_pocket | Q06187                                                 | 26542378                        |
| osimertinib     | Front_pocket | P00533                                                 | 27071706                        |
| olmutinib       | Front_pocket | P51813 Q06187 P51451<br>P00533 Q08881 P52333<br>P42680 | 27090981                        |
| nazartinib      | Front_pocket | P00533                                                 | 27433829                        |
| FIIN-3          | Front_pocket | P22455 P00533                                          | 25776529                        |
| BLU9931         | Hing-1       | P22455                                                 | 25776529                        |
| CMK             | P-loop       | P51812 Q15418                                          | 15919995                        |
| FIIN-1          | P-loop       | P11362 P21802 P22607 P22455                            | 20338520                        |
| CHEMBL1802381   | P-loop       | P51955                                                 | 21627121                        |
| CHEMBL1802870   | P-loop       | P51955                                                 | 21627121                        |
| CHEMBL1802387   | P-loop       | P51955                                                 | 21627121                        |
| CHEMBL1802382   | P-loop       | P51955                                                 | 21627121                        |
| CHEMBL1802383   | P-loop       | P51955                                                 | 21627121                        |
| CHEMBL1802384   | P-loop       | P51955                                                 | 21627121                        |



|                 |                           |                      |                                 |
|-----------------|---------------------------|----------------------|---------------------------------|
| 21627121-12     | P-loop                    | P51955               | 21627121                        |
| CHEMBL1802388   | P-loop                    | P51955               | 21627121                        |
| CHEMBL1802869   | P-loop                    | P51955               | 21627121                        |
| CHEMBL1802872   | P-loop                    | P51955               | 21627121                        |
| RCI16           | P-loop                    | P51812               | 22466421                        |
| RCI14           | P-loop                    | P51812               | 22466421                        |
| FMK             | P-loop                    | P51812 Q15418        | 22466421; 22806944;<br>15919995 |
| 23540679-4      | P-loop                    | P51812 P51955 P53350 | 23540679                        |
| SCHEMBL1907851  | P-loop                    | P51812 P51955        | 23540679                        |
| SCHEMBL12675979 | P-loop                    | P51812 P51955 P53350 | 23540679                        |
| SCHEMBL12675980 | P-loop                    | P51812 P51955 P53350 | 23540679                        |
| SCHEMBL1904658  | P-loop                    | P51812 P51955 P53350 | 23540679                        |
| SCHEMBL14682587 | P-loop                    | P51812 P51955 P53350 | 23540679                        |
| 1LB             | P-loop                    | P51812               | 23540679                        |
| SCHEMBL1905217  | P-loop                    | P51812 P51955 P53350 | 23540679                        |
| SCHEMBL12676021 | P-loop                    | P51812 P51955 P53350 | 23540679                        |
| ZINC00018730    | P-loop                    | P51812 P51955 P53350 | 23540679                        |
| 23540679-3      | P-loop                    | P51812 P51955 P53350 | 23540679                        |
| 23540679-5      | P-loop                    | P51812               | 23540679                        |
| 23540679-10     | P-loop                    | P51812 P53350        | 23540679                        |
| 1LE             | P-loop                    | P51812               | 23540679                        |
| 1LC             | P-loop                    | P51812               | 23540679                        |
| O37             | P-loop                    | P22455               | 25776529                        |
| 23225637-2      | Extended_front-<br>pocket | Q16539               | 23225637                        |
| Bio-THZ1        | Remote_Cys                | P50613               | 25043025                        |
| THZ1            | Remote_Cys                | P50613 Q9NYV4        | 25043025                        |
| TX1-85-1        | Roof                      | P21860               | 26094118; 25326665              |
| TX2-121-1       | Roof                      | P21860               | 26094118; 25326665              |

**Table S6.** The sequence alignment of the kinases with the available cysteines in five different regions across the human kinome.

|                               |                  |                            |                  |
|-------------------------------|------------------|----------------------------|------------------|
| <b>Region: P-loop</b>         |                  | Obscn                      | PE-----LL-----PC |
| ZAP70                         | GCG--N-FG--SV    | MAP2K7                     | C-----AE-----KL  |
| MET                           | GRG--H-FG--CV    | JNK2                       | N-----LC-----QV  |
| FGFR1                         | GEG--C-FG--QV    | JNK1                       | N-----LC-----QV  |
| FGFR2                         | GEG--C-FG--QV    | JNK3                       | N-----LC-----QV  |
| FGFR3                         | GEG--C-FG--QV    | PFTAIRE1                   | D-----LC-----QY  |
| TNK1                          | GSG--C-FG--VV    | SPEG                       | RE-----LL-----CG |
| FGR                           | GTG--C-FG--DV    | <b>Region: DFG-3</b>       |                  |
| SRC                           | GQG--C-FG--EV    | FLT4                       | C                |
| YES                           | GQG--C-FG--EV    | FLT1                       | C                |
| ROR1                          | GEC--A-FG--KI    | KDR                        | C                |
| FGFR4                         | GEG--C-FG--QV    | PDGFRa                     | C                |
| CR1K                          | GCG--H-FA--EV    | PDGFRb                     | C                |
| PLK1                          | GKG--G-FA--KC    | KIT                        | C                |
| PLK2                          | GKG--G-FA--KC    | FLT3                       | C                |
| PLK3                          | GKG--G-FA--RC    | Obscn                      | C                |
| RSK42                         | GVG--S-YS--VC    | SPEG                       | C                |
| RSK32                         | GVG--S-YS--VC    | Fused                      | C                |
| RSK12                         | GVG--S-YS--EC    | MAPKAPK5                   | C                |
| RSK22                         | GVG--S-YS--VC    | RSK4                       | C                |
| MSK12                         | GEG--S-FS--IC    | RSK3                       | C                |
| MSK22                         | GQG--S-FS--VC    | RSK1                       | C                |
| CHK2                          | GSG--A-CG--EV    | RSK2                       | C                |
| VACAMKL                       | KTE--E-FC--EI    | PKD2                       | C                |
| CK1g2                         | GCG--N-FG--EL    | PKD1                       | C                |
| CK1g1                         | GCG--N-FG--EL    | PKD3                       | C                |
| CK1g3                         | GCG--N-FG--EL    | MNK2                       | C                |
| VRK1                          | GQG--G-FG--CI    | GAK                        | C                |
| PAN3                          | NFG--Y-IT--SC    | AAK1                       | C                |
| ACTR2                         | ARG--R-FG--CV    | BIKE                       | C                |
| ACTR2B                        | ARG--R-FG--CV    | PRP4                       | C                |
| SgK223                        | GDA--I-YY--CA    | GSK3A                      | C                |
| Erk3                          | GCG--G-NG--LV    | GSK3B                      | C                |
| MAP2K7                        | GSG--T-CG--QV    | NIK                        | C                |
| SuRTK106                      | CSG--S-CG--PI    | MAP2K1                     | C                |
| SgK069                        | GQG--C-YG--RV    | MAP2K2                     | C                |
| IRAK1                         | GEG--G-FG--CV    | MAP2K7                     | C                |
| LIMK1                         | GKG--C-FG--QA    | MAP2K4                     | C                |
| NEK10                         | GSG--A-FG--CV    | MAP2K3                     | C                |
| NEK2                          | GTG--S-YG--RC    | MAP2K6                     | C                |
| MAP3K1                        | GLG--A-FS--SC    | SuRTK106                   | C                |
| <b>Region: roof of pocket</b> |                  | MNK1                       | C                |
| ErbB3                         | VCI              | TAK1                       | C                |
| <b>Region: front pocket</b>   |                  | ZAK                        | C                |
| JAK3                          | GCL-----R-----DF | Erk7                       | C                |
| EGFR                          | GCL-----L-----DY | NLK                        | C                |
| ErbB2                         | GCL-----L-----DH | Erk1                       | C                |
| BLK                           | GCL-----L-----DF | Erk2                       | C                |
| EphB3                         | CAL-----D-----SF | CDKL5                      | C                |
| ErbB4                         | GCL-----L-----EY | CDKL1                      | C                |
| BMX                           | GCL-----L-----NY | CDKL4                      | C                |
| BTK                           | GCL-----L-----NY | CDKL2                      | C                |
| ITK                           | GCL-----S-----DY | CDKL3                      | C                |
| TEC                           | GCL-----L-----NF | MAP2K5                     | C                |
|                               |                  | <b>Region: Catalytic-3</b> |                  |
|                               |                  | JAK3                       | C                |

|        |                    |        |   |
|--------|--------------------|--------|---|
| TXK    | GCL-----L-----NY   | PYK2   | C |
| MAST3  | GDC-----A-----TL   | FGFR1  | C |
| MAST2  | GDC-----A-----TL   | FGFR2  | C |
| MAST1  | GDC-----A-----TL   | FGFR3  | C |
| MAST4  | GDC-----A-----TL   | FLT4   | C |
| Trio   | GRL-----L-----DC   | FLT1   | C |
| TSSK3  | GDV-----F-----DC   | KDR    | C |
| CASK   | ADL-----C-----FE   | PDGFRa | C |
| ATM    | QPVFRYFCMEKFLDPAIW | PDGFRb | C |
| SMG1   | PNLLAKELWSSCTTPDEW | KIT    | C |
| ADCK4  | VPL-----DQC        | FMS    | C |
| ADCK5  | CKV-----NDV        | FLT3   | C |
| RIOK2  | -----YPL---CQI     | FGFR4  | C |
| NME7a  | -----DAI---CEW     | FER    | C |
| SgK493 | -----DLGSCVRE---   | FES    | C |
| RNAseL | C---LDVHRG-----    | ANPa   | C |
| BMPR2  | -----GSLCKY        | STLK6  | C |
| MISR2  | -----GSLCHY        | CDKL1  | C |
| PINK1  | -----CTL---        | CDKL4  | C |

**Figure S1.** Accessible cysteines at the different locations presented on a reference binding site (pdb id 3byu).

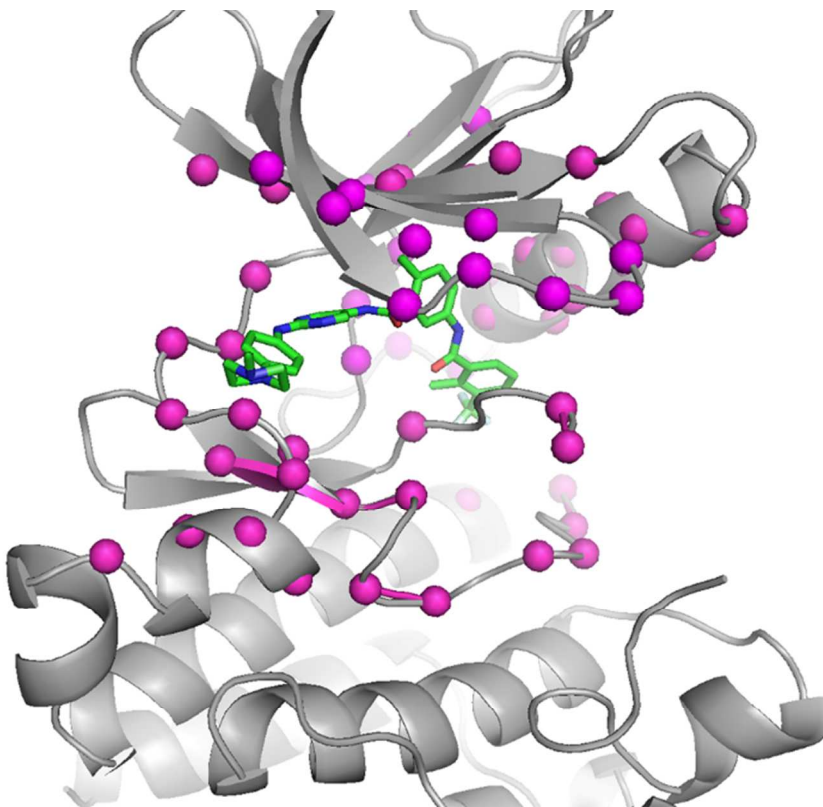

**Figure S2.** The high resolution figure for the kinases with available cysteines across the human structural kinome as shown in Figure 7b.

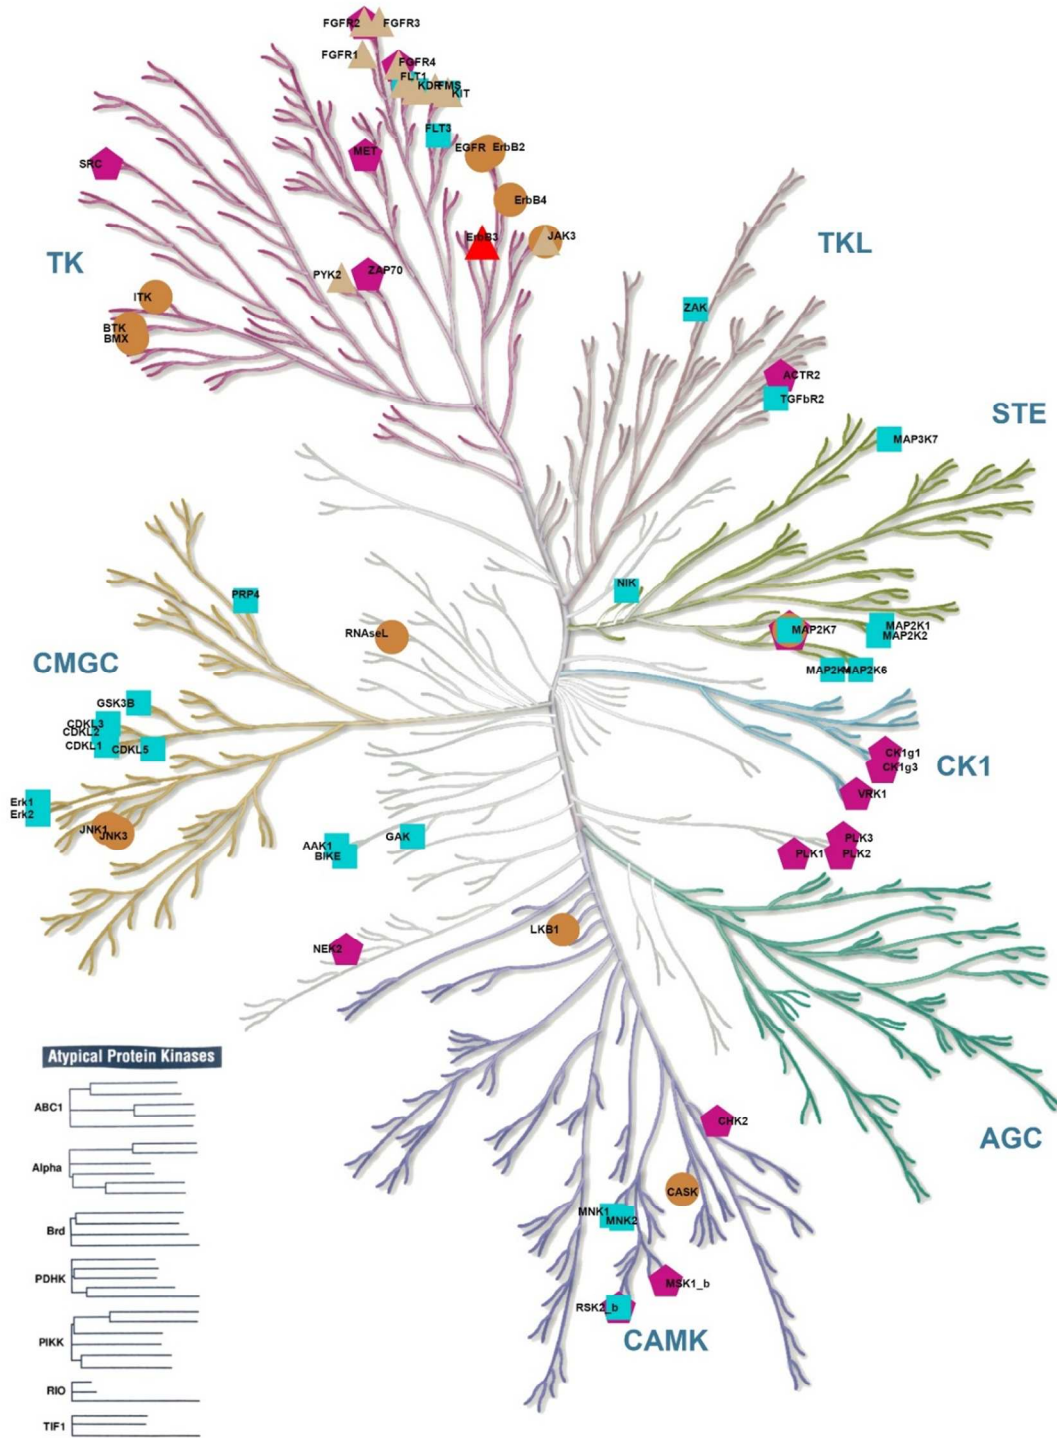

**Figure S3.** The high resolution figure for the kinases with available cysteines for all kinases without PDB released as shown in Figure 7c.

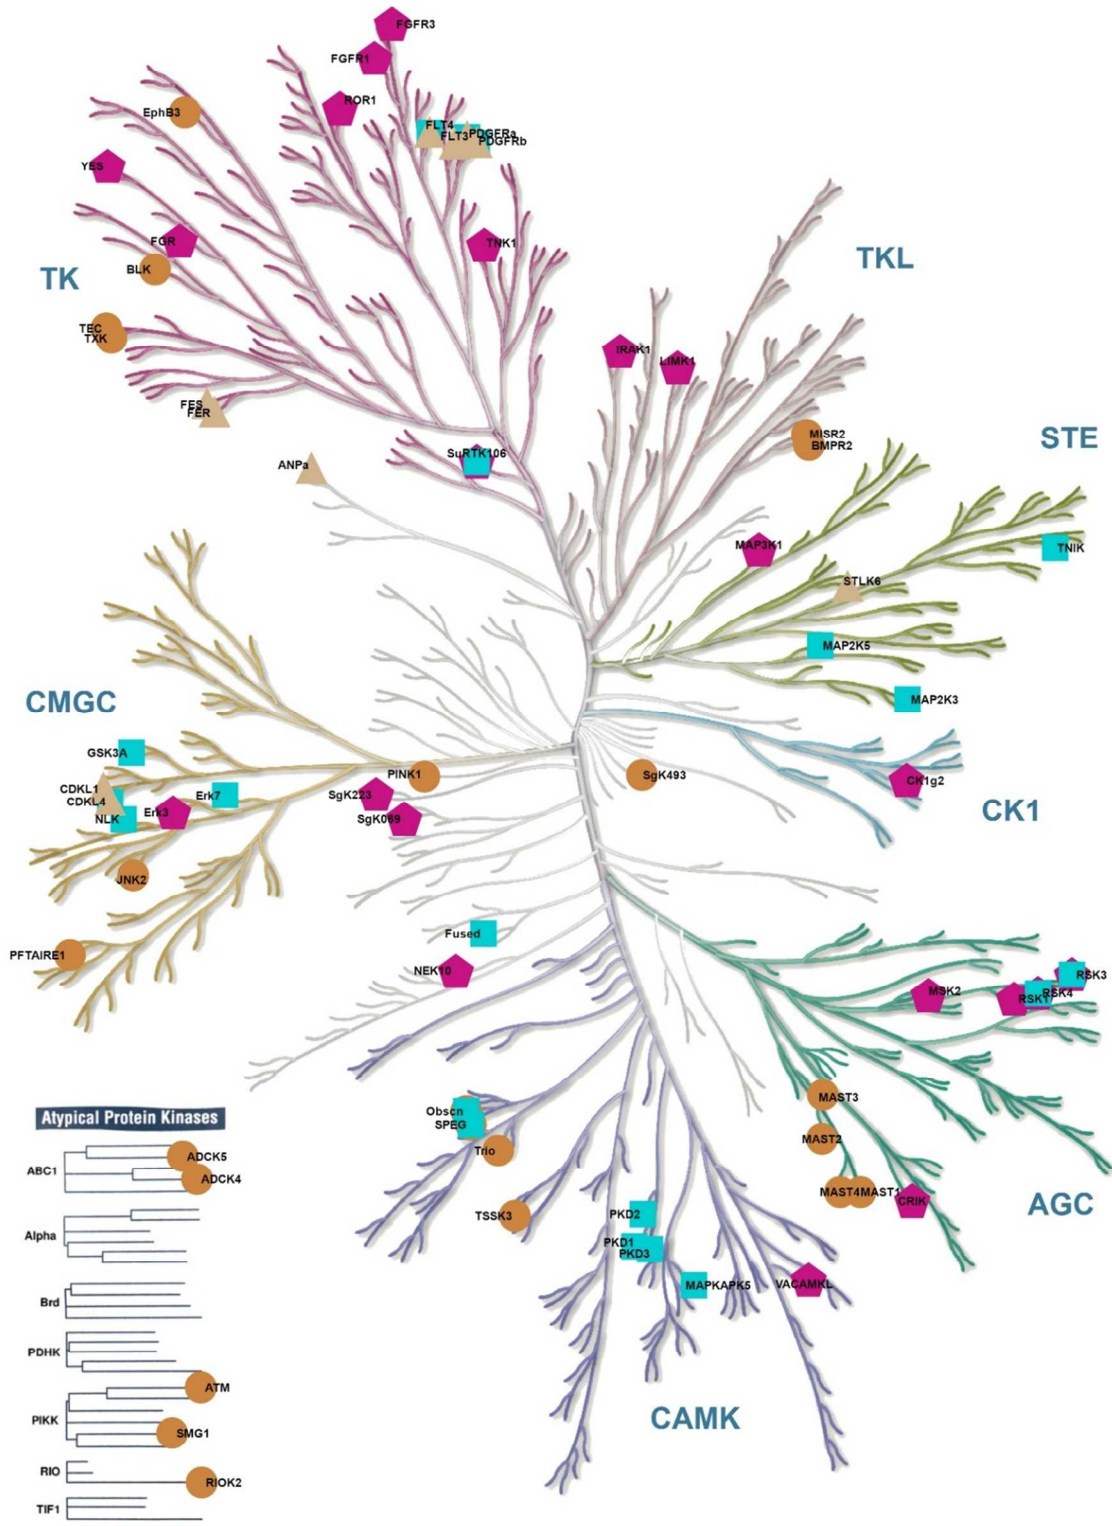

Supplement: NIHMS862127-supplement-S2.pdf [file NIHMS862127-supplement-S2.pdf]
